# Supplementary material for: A Binary Mixture of Emamectin Benzoate and Chlorantraniliprole Supplemented with an Adjuvant Effectively Controls Spodoptera frugiperda
Source: MDPI journal article supplement (doi:10.3390/insects13121157), 2022-12-15
Supplement: s1 [file s1]

## Supplementary figures

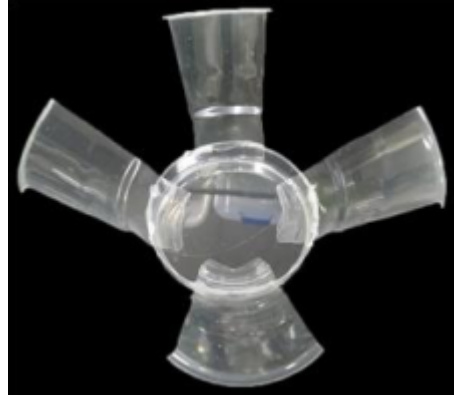

**Figure S1.** A home-made tray assembling the natural position of a maize leaf.

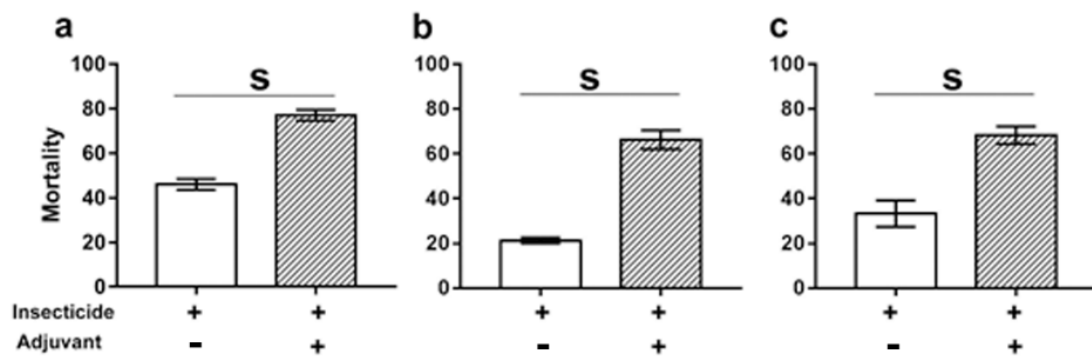

**Figure S2.** Mortality of FAW treated with insecticide with or without adjuvant Jijian<sup>®</sup>. The tested insecticides were 10 mg/L diflubenzuron (a), 10 mg/L pleocidin (b), and 100 mg/L beta-cypermethrin (c). Data are expressed as mean  $\pm$  SE of at least three independent assays. s, significant difference by *t* test ( $P < 0.05$ ). +, insecticide or adjuvant present; -, insecticide or adjuvant absent.

**Table S1. Efficacy evaluation of insecticides and their mixture with and without adjuvant in a field trial.**

| Treatment         | Treatment details*                                           | Trial plot code | Insect count |            |       |       | Inhibition of emergence (EI, %) |        |        | EI mean (%) |       |       | 95% confidential limit of EI <sup>#</sup> |      |              |      |              |      |
|-------------------|--------------------------------------------------------------|-----------------|--------------|------------|-------|-------|---------------------------------|--------|--------|-------------|-------|-------|-------------------------------------------|------|--------------|------|--------------|------|
|                   |                                                              |                 | Pre-spray    | Post-spray |       |       |                                 |        |        |             |       |       | day 1                                     |      | day 3        |      | day 7        |      |
|                   |                                                              |                 | day 0        | day 1      | day 3 | day 7 | day 1                           | day 3  | day 7  | day 1       | day 3 | day 7 | 95% CL of EI                              | Sig. | 95% CL of EI | Sig. | 95% CL of EI | Sig. |
| 5% EB             | 15 g/ha.                                                     | 1-1             | 25           | 5          | 0     | 1     | 73.82                           | 100.00 | 88.52  | 80.79       | 89.96 | 91.24 | 75.24~86.34                               | cd   | 78.16~101.75 | b    | 85.31~97.16  | b    |
|                   |                                                              | 1-2             | 29           | 4          | 3     | 1     | 81.95                           | 83.85  | 90.10  |             |       |       |                                           |      |              |      |              |      |
|                   |                                                              | 1-3             | 21           | 2          | 0     | 1     | 87.54                           | 100.00 | 86.33  |             |       |       |                                           |      |              |      |              |      |
|                   |                                                              | 1-4             | 26           | 4          | 4     | 0     | 79.86                           | 75.98  | 100.00 |             |       |       |                                           |      |              |      |              |      |
| 200g/L CT         | 150 ml/ha.                                                   | 2-1             | 19           | 10         | 2     | 0     | 31.11                           | 83.56  | 100.00 | 47.15       | 81.36 | 87.51 | 29.03~65.27                               | b    | 75.76~86.96  | b    | 75.83~99.18  | b    |
|                   |                                                              | 2-2             | 20           | 4          | 3     | 2     | 73.82                           | 76.58  | 71.29  |             |       |       |                                           |      |              |      |              |      |
|                   |                                                              | 2-3             | 27           | 12         | 4     | 1     | 41.83                           | 76.87  | 89.37  |             |       |       |                                           |      |              |      |              |      |
|                   |                                                              | 2-4             | 27           | 12         | 2     | 1     | 41.83                           | 88.43  | 89.37  |             |       |       |                                           |      |              |      |              |      |
| EB×CT I           | 13.5 g/ha. 5% EB + 0.375 mL/ha. 200g/L CT                    | 3-1             | 14           | 3          | 2     | 1     | 71.95                           | 77.69  | 79.49  | 70.80       | 86.50 | 89.35 | 65.32~76.29                               | bc   | 78.76~94.24  | b    | 77.29~101.42 | b    |
|                   |                                                              | 3-2             | 26           | 5          | 3     | 2     | 74.83                           | 81.98  | 77.92  |             |       |       |                                           |      |              |      |              |      |
|                   |                                                              | 3-3             | 21           | 6          | 1     | 0     | 62.61                           | 92.56  | 100.00 |             |       |       |                                           |      |              |      |              |      |
|                   |                                                              | 3-4             | 25           | 5          | 1     | 0     | 73.82                           | 93.75  | 100.00 |             |       |       |                                           |      |              |      |              |      |
| EB×CT II          | 2.7 g/ha. 5% EB + 0.075 mL/ha. 200g/L CT                     | 4-1             | 19           | 6          | 7     | 3     | 58.67                           | 42.47  | 54.67  | 58.26       | 68.83 | 76.47 | 47.17~69.34                               | bc   | 51.42~86.25  | b    | 61.44~91.49  | b    |
|                   |                                                              | 4-2             | 20           | 8          | 3     | 1     | 47.65                           | 76.58  | 85.65  |             |       |       |                                           |      |              |      |              |      |
|                   |                                                              | 4-3             | 25           | 5          | 4     | 1     | 73.82                           | 75.02  | 88.52  |             |       |       |                                           |      |              |      |              |      |
|                   |                                                              | 4-4             | 25           | 9          | 3     | 2     | 52.88                           | 81.26  | 77.03  |             |       |       |                                           |      |              |      |              |      |
| EB×CT II×adjuvant | 2.7 g/ha. 5% EB +0.075 mL/ha. 200g/L CT +450 mL/ha. Adjuvant | 5-1             | 22           | 6          | 3     | 2     | 64.30                           | 78.71  | 73.90  | 71.71       | 86.98 | 84.37 | 60.74~82.68                               | c    | 80.30~93.65  | b    | 73.09~95.64  | b    |
|                   |                                                              | 5-2             | 17           | 3          | 1     | 0     | 76.90                           | 90.82  | 100.00 |             |       |       |                                           |      |              |      |              |      |
|                   |                                                              | 5-3             | 20           | 6          | 2     | 1     | 60.74                           | 84.39  | 85.65  |             |       |       |                                           |      |              |      |              |      |
|                   |                                                              | 5-4             | 26           | 3          | 1     | 2     | 84.90                           | 93.99  | 77.92  |             |       |       |                                           |      |              |      |              |      |

|       |                        |     |    |    |    |   |       |        |       |       |       |       |            |   |            |   |            |   |
|-------|------------------------|-----|----|----|----|---|-------|--------|-------|-------|-------|-------|------------|---|------------|---|------------|---|
| Water | 450 L/ha.<br>tap water | 6-1 | 25 | 20 | 18 | 8 | -4.71 | -12.42 | 8.13  | -0.04 | -0.05 | -0.49 | -3.67~3.59 | a | -9.26~9.16 | a | -7.53~6.56 | a |
|       |                        | 6-2 | 17 | 13 | 11 | 6 | -0.09 | -1.03  | -1.33 |       |       |       |            |   |            |   |            |   |
|       |                        | 6-3 | 26 | 19 | 15 | 9 | 4.36  | 9.92   | 0.62  |       |       |       |            |   |            |   |            |   |
|       |                        | 6-4 | 21 | 16 | 13 | 8 | 0.28  | 3.34   | -9.37 |       |       |       |            |   |            |   |            |   |

\*, ha., hectare

#, sig., significance among treatments were examine via ordinary one-way ANOVA. Different letters represent significant defferences.
